# Supplementary figures and images for: Polydopamine-assisted one-step modification of nanofiber surfaces with adenosine to tune the osteogenic differentiation of mesenchymal stem cells and the maturation of osteoclasts
Source: Royal Society of Chemistry journal article supplement (doi:10.1039/c9bm01990a), 2020-01-01

# Supplementary Figure S1 .

a)

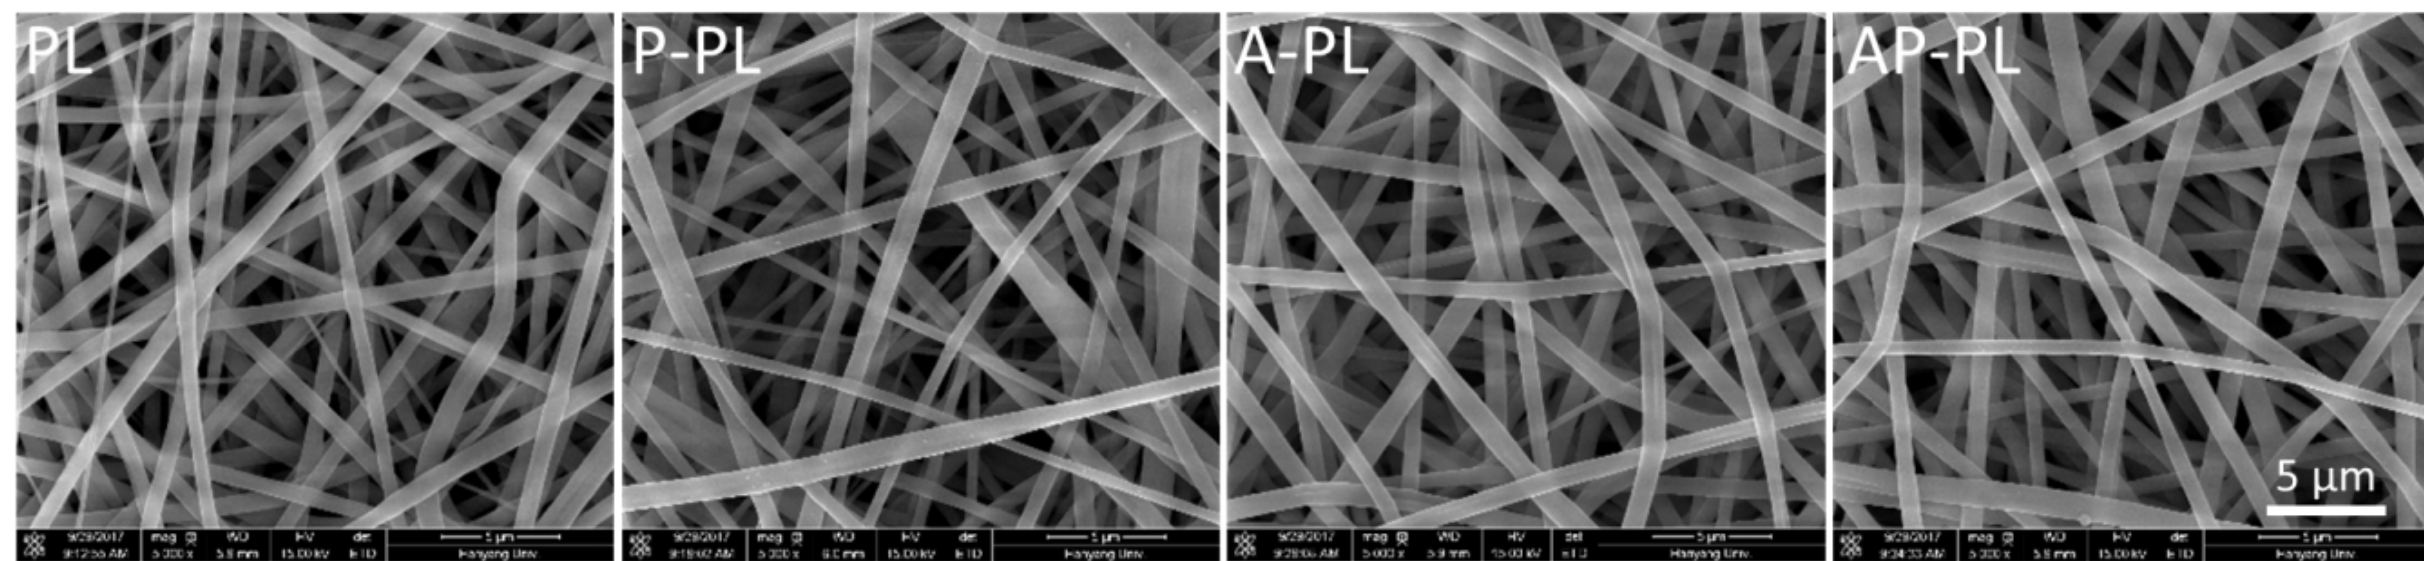

b)

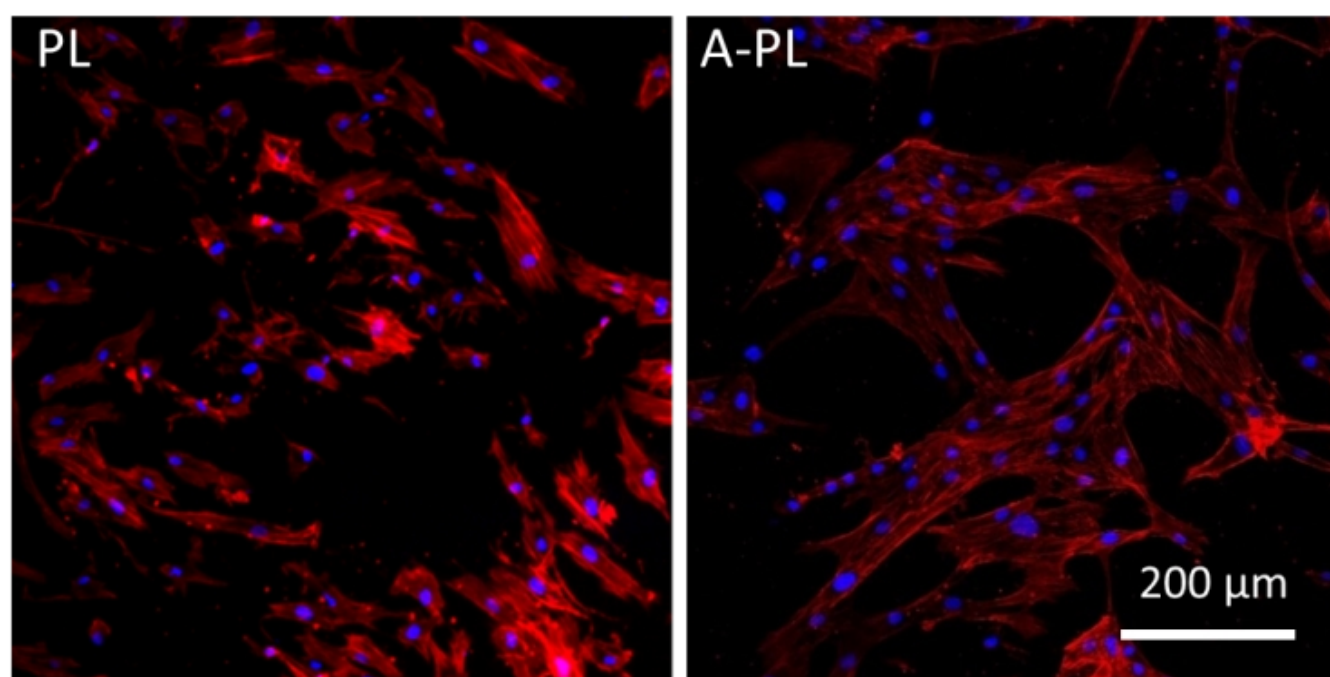

Supplement: c9bm01990a1.pdf [file c9bm01990a1.pdf]
